# Supplementary material for: Dopant preferential site occupation and high efficiency white emission in K2BaCa(PO4)2:Eu2+,Mn2+ phosphors for high quality white LED applications
Source: Royal Society of Chemistry journal article supplement (doi:10.1039/c9qi00138g), 2019-01-01
Supplement: c9qi00138g1.pdf [file c9qi00138g1.pdf]

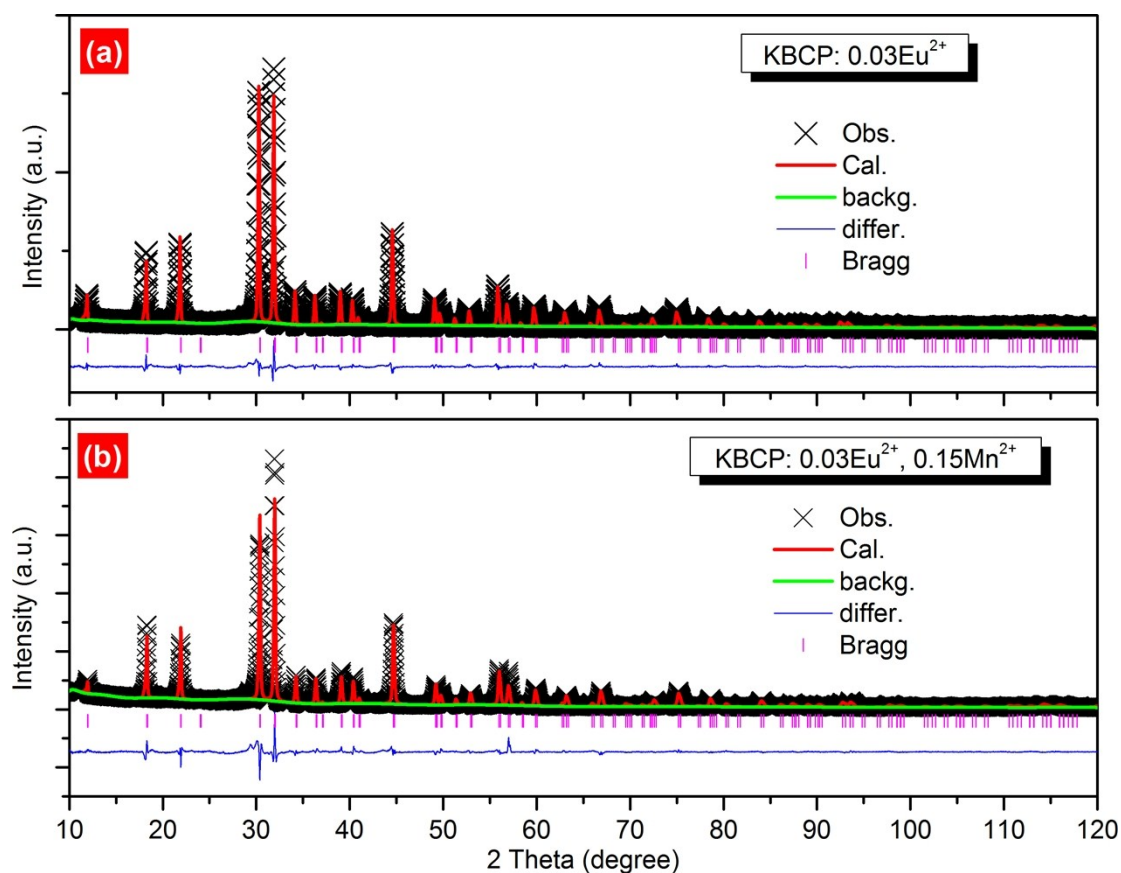

Figure S1 Rietveld refinement of the XRD profile of KBCP: 0.03Eu<sup>2+</sup> (a) and KBCP: 0.03Eu<sup>2+</sup>, 0.05Mn<sup>2+</sup> sample (b)

Table S1 Main processing and refinement parameters of K<sub>2</sub>BaCa(PO<sub>4</sub>)<sub>2</sub>: 0.03Eu<sup>2+</sup> sample from the Rietveld Structure Analysis

| Phase data              |                                                                                           |       |          |          |          |                            |
|-------------------------|-------------------------------------------------------------------------------------------|-------|----------|----------|----------|----------------------------|
| Composition             | K <sub>2-0.03</sub> BaCa(PO <sub>4</sub> ) <sub>2</sub> : 0.03Eu <sup>2+</sup>            |       |          |          |          |                            |
| Space group             | Trigonal, <i>P</i> -3m1(164)                                                              |       |          |          |          |                            |
| Cell parameters         | <i>a</i> = 5.6040 Å, <i>c</i> = 7.4161 Å, <i>V</i> = 201.70 Å <sup>3</sup> , <i>Z</i> = 1 |       |          |          |          |                            |
| Final agreement factors | <i>R</i> <sub>wp</sub> = 8.71 %, <i>R</i> <sub>p</sub> = 7.37 %, $\chi^2$ = 3.969         |       |          |          |          |                            |
| Atomic parameters       |                                                                                           |       |          |          |          |                            |
| Atom                    | Wyck.                                                                                     | S.O.F | <i>x</i> | <i>y</i> | <i>z</i> | <i>U</i> (Å <sup>2</sup> ) |
| Ba1                     | 1b                                                                                        | 1     | 0        | 0        | 1/2      | 0.0255                     |
| Ca2                     | 2d                                                                                        | 0.5   | 1/3      | 2/3      | 0.82025  | 0.0221                     |
| K2                      | 2d                                                                                        | 0.5   | 1/3      | 2/3      | 0.82025  | 0.0221                     |
| K3                      | 1a                                                                                        | 0.97  | 0        | 0        | 0        | 0.0080                     |
| Eu3                     | 1a                                                                                        | 0.03  | 0        | 0        | 0        | 0.0080                     |
| P1                      | 2d                                                                                        | 1     | 1/3      | 2/3      | 0.27285  | 0.0115                     |
| O1                      | 2d                                                                                        | 1     | 1/3      | 2/3      | 0.48471  | 0.0308                     |
| O2                      | 6i                                                                                        | 1     | 0.18594  | 0.81424  | 0.19836  | 0.0362                     |

Table S2 Main processing and refinement parameters of  $\text{K}_2\text{BaCa}(\text{PO}_4)_2: 0.03\text{Eu}^{2+}, 0.15\text{Mn}^{2+}$  sample from the Rietveld Structure Analysis

| Phase data              |                                                                                       |       |         |         |         |                  |
|-------------------------|---------------------------------------------------------------------------------------|-------|---------|---------|---------|------------------|
| Composition             | $\text{K}_{2-0.18}\text{BaCa}(\text{PO}_4)_2: 0.03\text{Eu}^{2+}, 0.05\text{Mn}^{2+}$ |       |         |         |         |                  |
| Space group             | Trigonal, $P-3m1(164)$                                                                |       |         |         |         |                  |
| Cell parameters         | $a = 5.5927 \text{ \AA}, c = 7.4005 \text{ \AA}, V = 200.47 \text{ \AA}^3, Z = 1$     |       |         |         |         |                  |
| Final agreement factors | $R_{\text{wp}} = 10.92 \%, R_{\text{p}} = 8.06 \%, \chi^2 = 7.958$                    |       |         |         |         |                  |
| Atomic parameters       |                                                                                       |       |         |         |         |                  |
| Atom                    | Wyck.                                                                                 | S.O.F | $x$     | $y$     | $z$     | $U (\text{Å}^2)$ |
| Ba1                     | 1b                                                                                    | 1     | 0       | 0       | 1/2     | 0.0208           |
| Ca2                     | 2d                                                                                    | 0.475 | 1/3     | 2/3     | 0.82447 | 0.0160           |
| K2                      | 2d                                                                                    | 0.525 | 1/3     | 2/3     | 0.82447 | 0.0160           |
| K3                      | 1a                                                                                    | 0.82  | 0       | 0       | 0       | 0.0006           |
| Eu3                     | 1a                                                                                    | 0.03  | 0       | 0       | 0       | 0.0006           |
| Mn3                     | 1a                                                                                    | 0.15  | 0       | 0       | 0       | 0.0006           |
| P1                      | 2d                                                                                    | 1     | 1/3     | 2/3     | 0.26808 | 0.0078           |
| O1                      | 2d                                                                                    | 1     | 1/3     | 2/3     | 0.48072 | 0.0057           |
| O2                      | 6i                                                                                    | 1     | 0.17965 | 0.82055 | 0.19151 | 0.0337           |
